# Supplementary material
Source: MDPI journal article supplement (https://www.mdpi.com/2073-4344/6/9/141)
Supplement: s1 [file s1]

# Supplementary Materials: Olefin Hydroborations with Diamidocarbene–BH<sub>3</sub> Adducts at Room Temperature

Dominika N. Lastovickova and Christopher W. Bielawski

Colorless single crystals were grown via the slow evaporation of a benzene solution of **10**. This compound crystallized in the primitive triclinic space group *P*-1 with two molecules of **10** in the asymmetric unit. Crystallographic measurements were carried out on a Rigaku AFC-12 (Rigaku, Tokyo, Japan via Rigaku Americas Corporation, The Woodlands, TX, USA) with a Saturn 724+ CCD area detector diffractometer using graphite-monochromated Mo K $\alpha$  radiation ( $\lambda = 0.71073$  Å) at 120 K using a Rigaku X-Stream stream low-temperature device (Rigaku, Tokyo, Japan via Rigaku Americas Corporation). A sample of suitable size and quality was selected and mounted onto a nylon loop. Data reductions were performed using CrystalClear 1.4.0 (Rigaku, Tokyo, Japan via Rigaku Americas Corporation, 2008) [1]. The structures were solved by direct methods, which successfully located most of the non-hydrogen atoms. Subsequent refinements on F<sup>2</sup> using the SHELXL-2014/6 package (Shelx, Göttingen, Germany) allowed location of the remaining non-hydrogen atoms [2]. Key details of the crystal and structure refinement data are summarized in Table S1. Cambridge Crystallographic Data Center (CCDC 1498521) contains the crystallographic data for the crystal structure reported herein.

**Table S1.** Summary of crystal data, data collection, and structure refinement details for **10**.

| Parameter                                  | DAC–BH <sub>3</sub> <i>cis</i> -3-hexene ( <b>10</b> )          |
|--------------------------------------------|-----------------------------------------------------------------|
| formula                                    | C <sub>30</sub> H <sub>43</sub> N <sub>2</sub> O <sub>2</sub> B |
| <i>M</i> <sub>r</sub>                      | 474.5                                                           |
| crystal size (mm <sup>3</sup> )            | 0.20 × 0.20 × 0.20                                              |
| crystal system                             | triclinic                                                       |
| space group                                | <i>P</i> -1                                                     |
| <i>a</i> (Å)                               | 9.4460 (13)                                                     |
| <i>b</i> (Å)                               | 12.5512 (21)                                                    |
| <i>c</i> (Å)                               | 12.8280 (17)                                                    |
| $\alpha$ (°)                               | 97.463 (6)                                                      |
| $\beta$ (°)                                | 110.784 (9)                                                     |
| $\gamma$ (°)                               | 96.693 (5)                                                      |
| <i>V</i> (Å <sup>3</sup> )                 | 1387.99 (60)                                                    |
| <i>Z</i>                                   | 2                                                               |
| $\rho_{\text{calc}}$ (g cm <sup>−3</sup> ) | 1.14                                                            |
| $\mu$ (mm <sup>−1</sup> )                  | 0.070                                                           |
| <i>F</i> (000)                             | 516.0                                                           |
| <i>T</i> (K)                               | 120 (2)                                                         |
| scan mode                                  | $\omega$                                                        |
|                                            | −10 → +11                                                       |
| <i>hkl</i> range                           | −14 → +14                                                       |
|                                            | −15 → +15                                                       |
| measd. reflns.                             | 16265                                                           |
| unique reflns. [ <i>R</i> <sub>int</sub> ] | 4766 [0.090]                                                    |
| refinement reflns                          | 4766                                                            |
| refined parameters                         | 326                                                             |
| GOF on <i>F</i> <sup>2</sup>               | 1.264                                                           |
| <i>R</i> 1 <sup>a</sup> (all data)         | 0.135 (0.191)                                                   |
| <i>wR</i> 2 <sup>b</sup> (all data)        | 0.348 (0.388)                                                   |
| $\rho_{\text{fin}}$ (max/min)              | 0.976                                                           |
| (e Å <sup>−3</sup> )                       | −0.512                                                          |

$$^a \text{ } R1 = \left( \frac{\sum \|F_o| - |F_c|\|}{\sum |F_o|} \right); \text{ } ^b \text{ } wR2 = \left\{ \frac{\sum w(F_o^2 - F_c^2)^2}{\sum w(F_o^2)^2} \right\}^{1/2}.$$

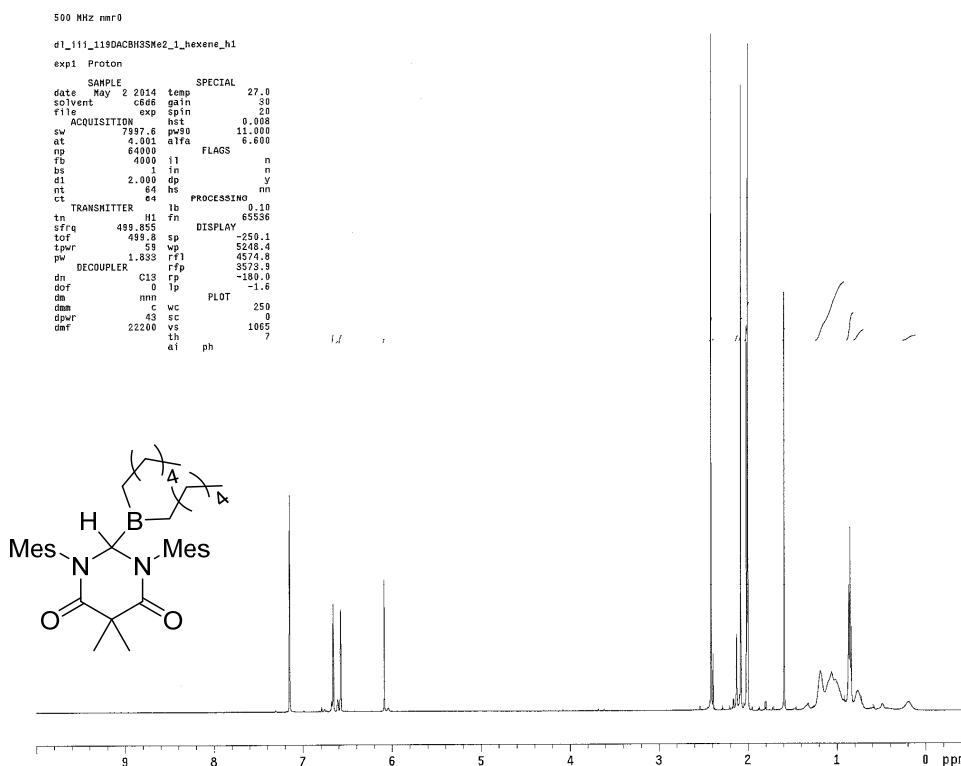Figure S1. <sup>1</sup>H NMR spectrum of 3.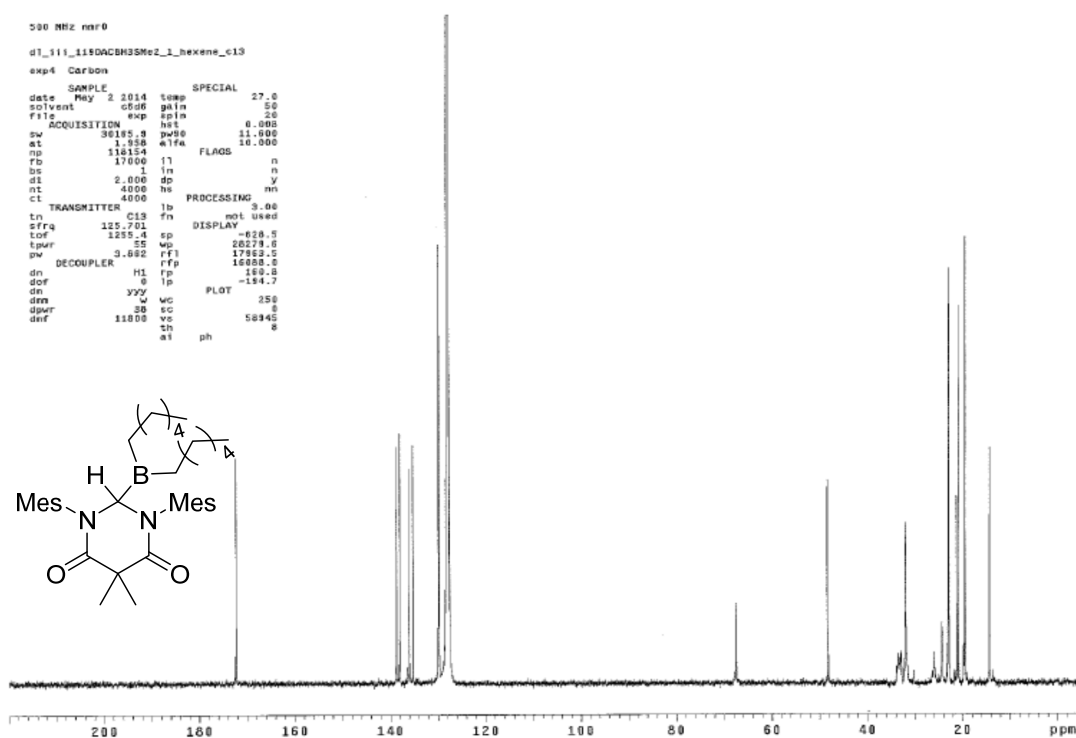Figure S2. <sup>13</sup>C NMR spectrum of 3.

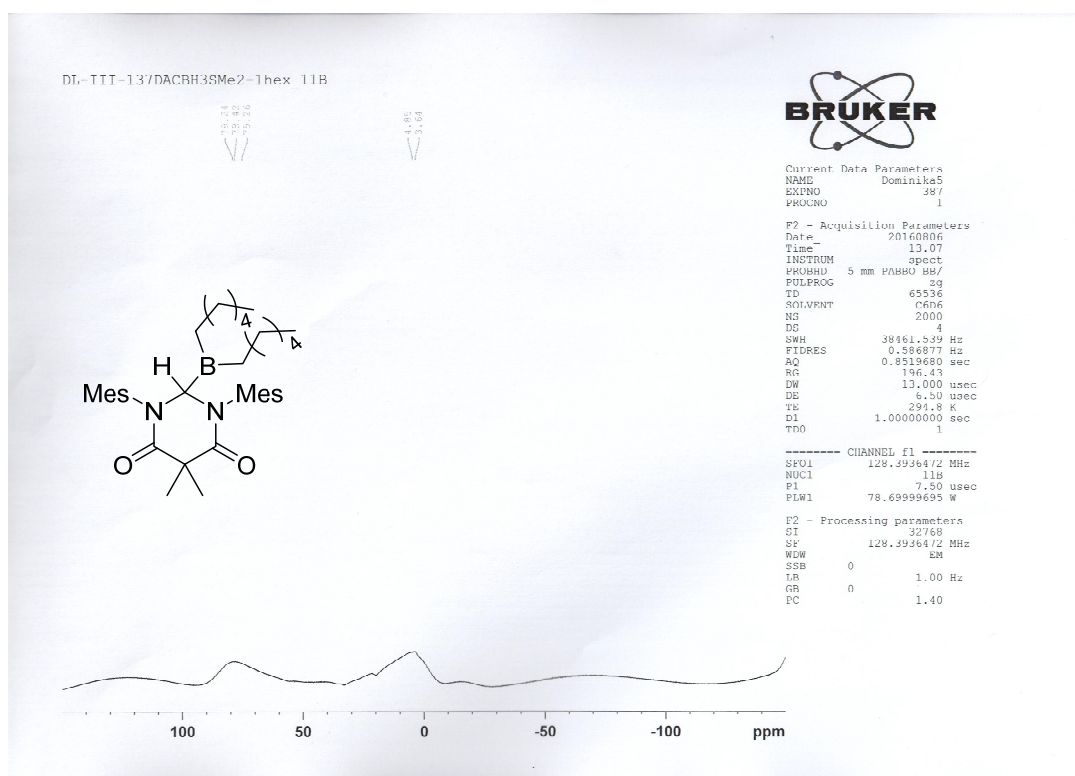Figure S3.  $^{11}\text{B}$  NMR spectrum of 3.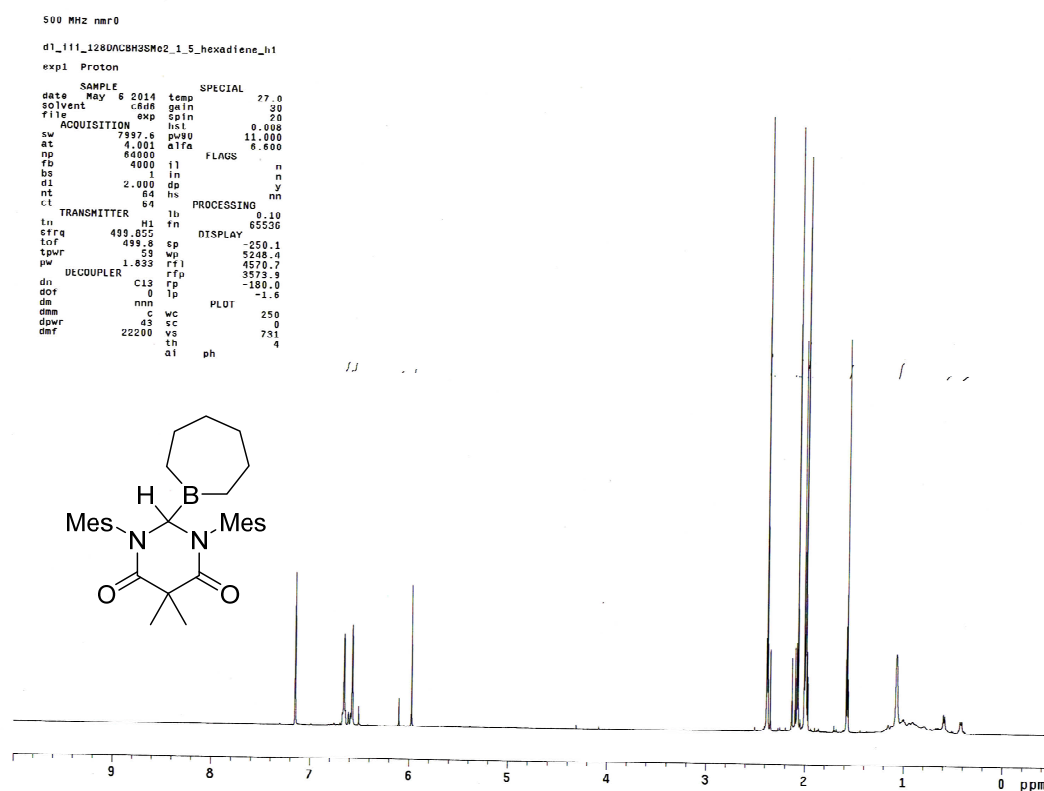Figure S4.  $^1\text{H}$  NMR spectrum of 4.

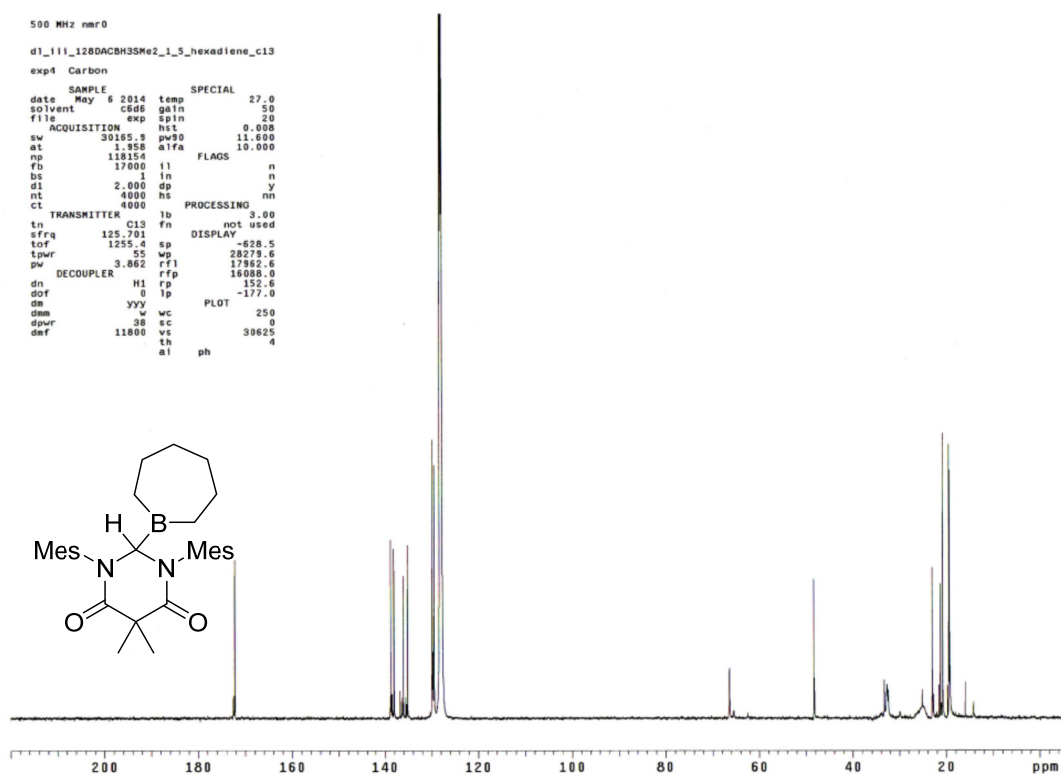Figure S5. <sup>13</sup>C NMR spectrum of 4.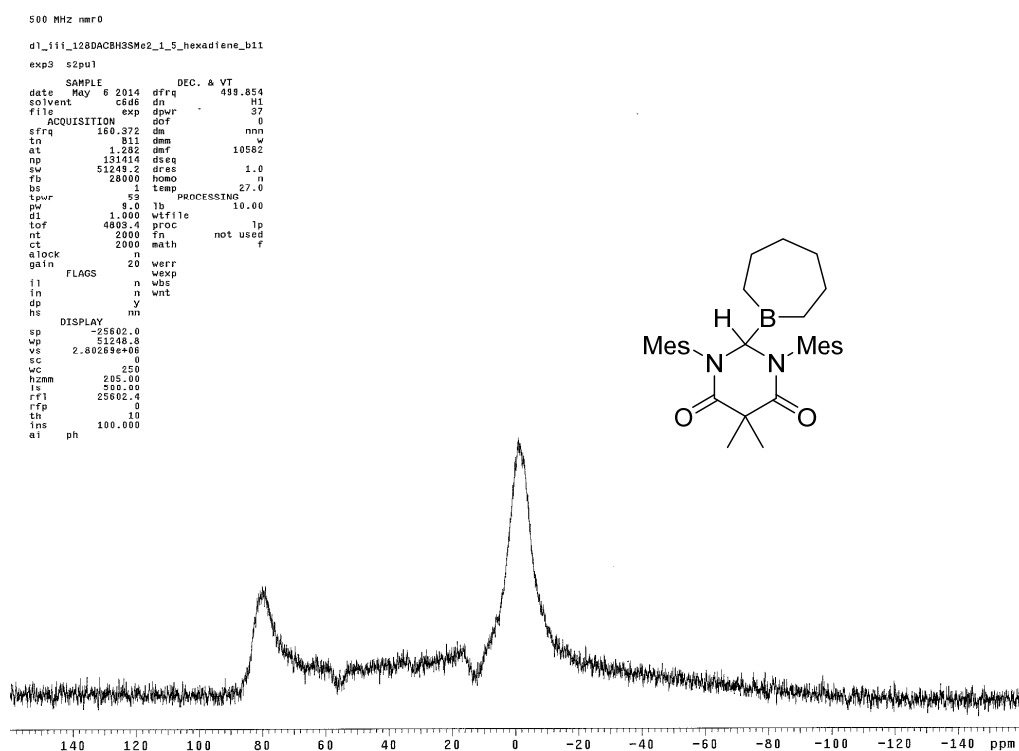Figure S6. <sup>11</sup>B NMR spectrum of 4.

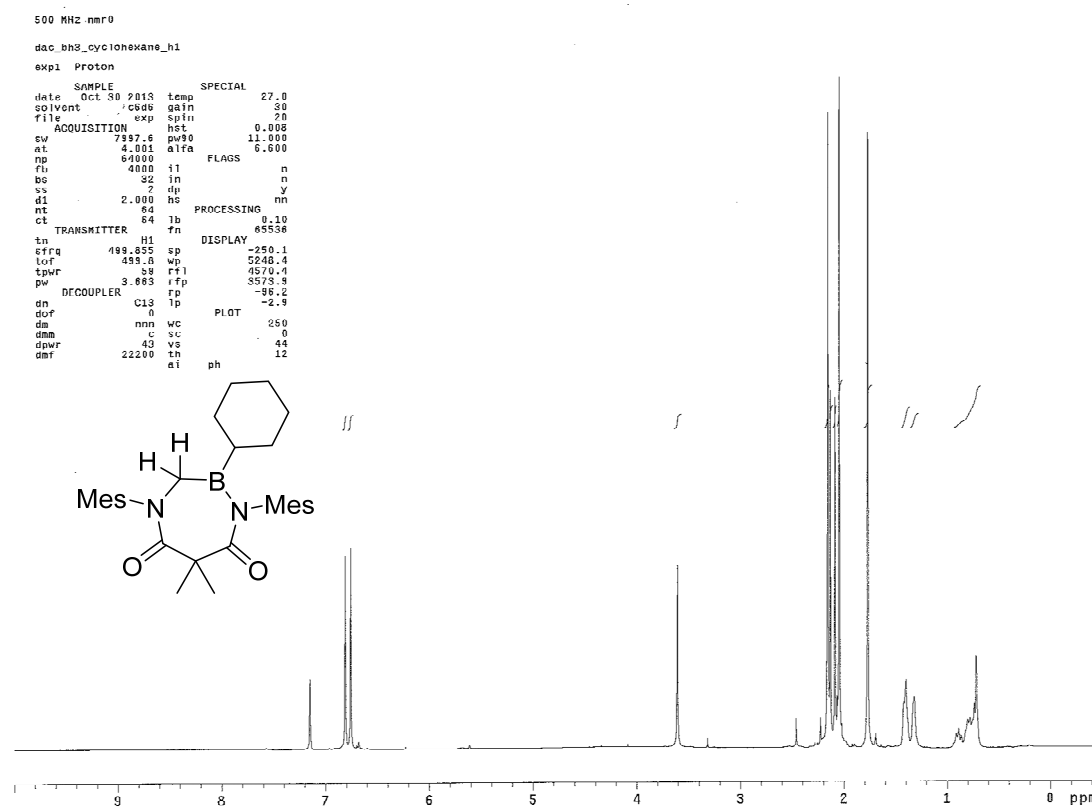Figure S7. <sup>1</sup>H NMR spectrum of 6.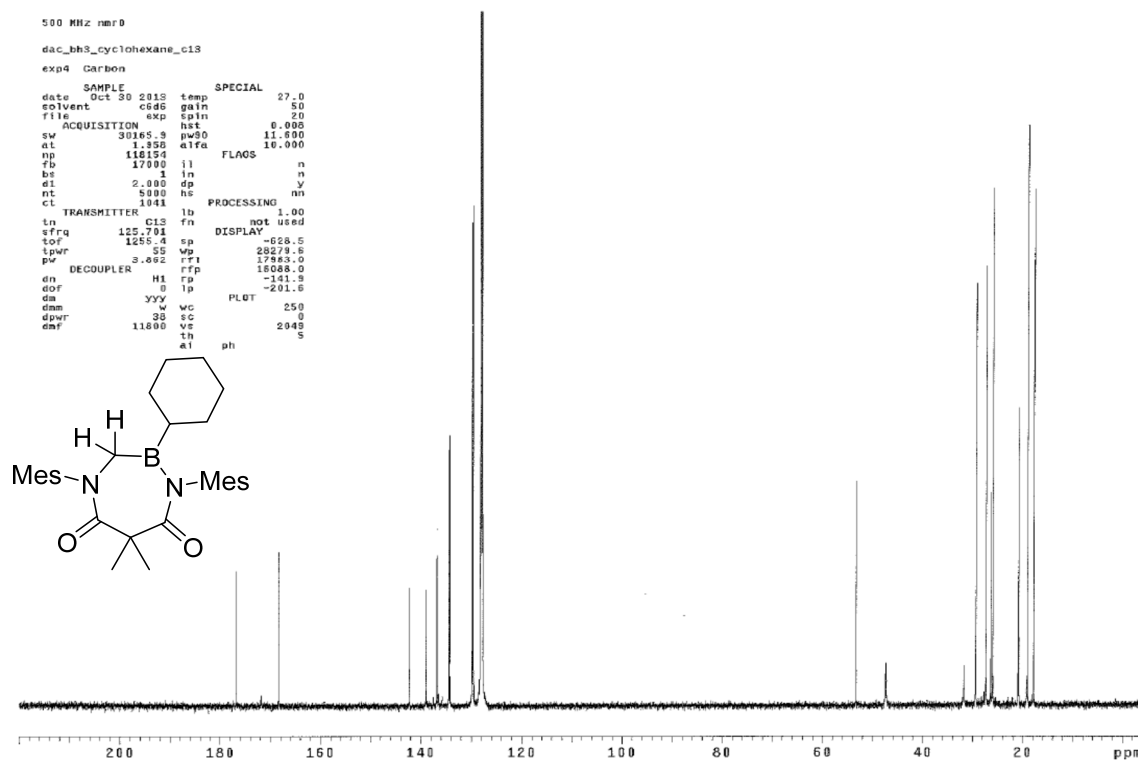Figure S8. <sup>13</sup>C NMR spectrum of 6.

dac\_uh3\_cyclohexane\_11b  
Pulse Sequence: s2pu1

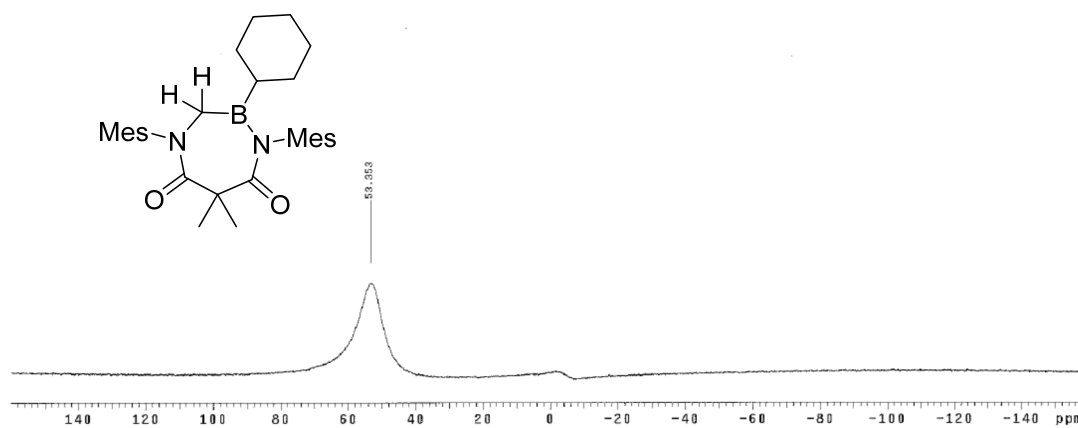

Figure S9.  $^{11}\text{B}$  NMR spectrum of 6.

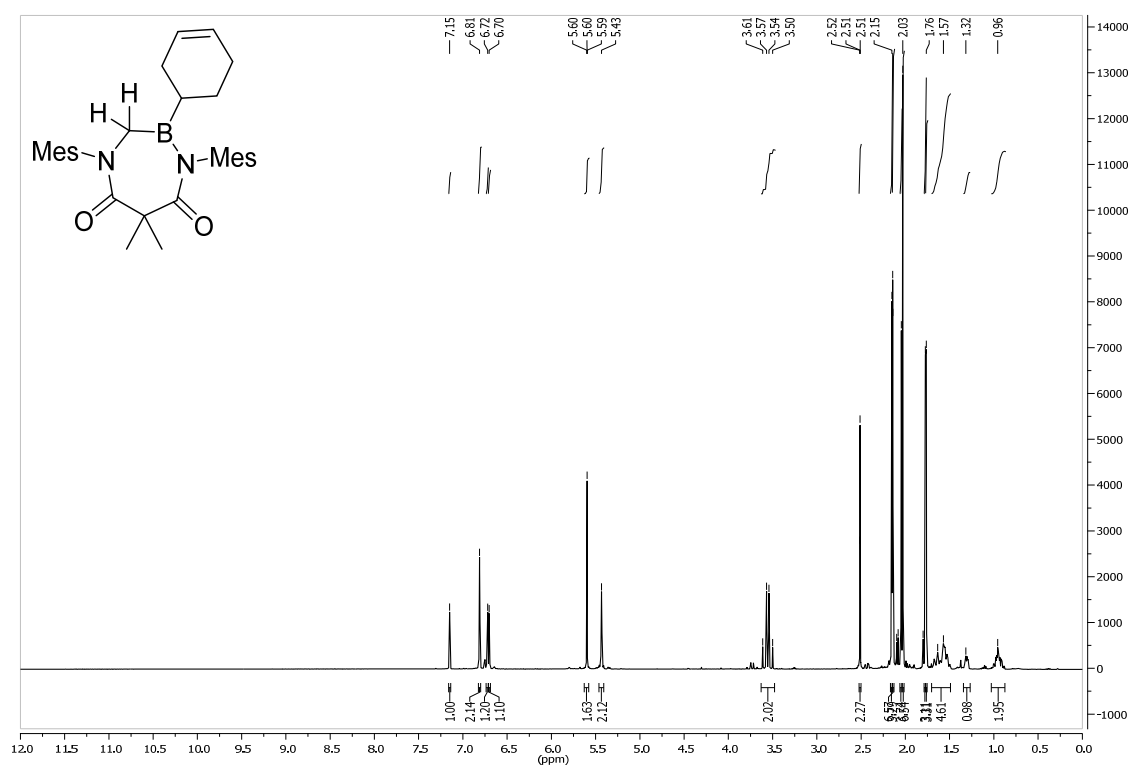

Figure S10.  $^1\text{H}$  NMR spectrum of 7.

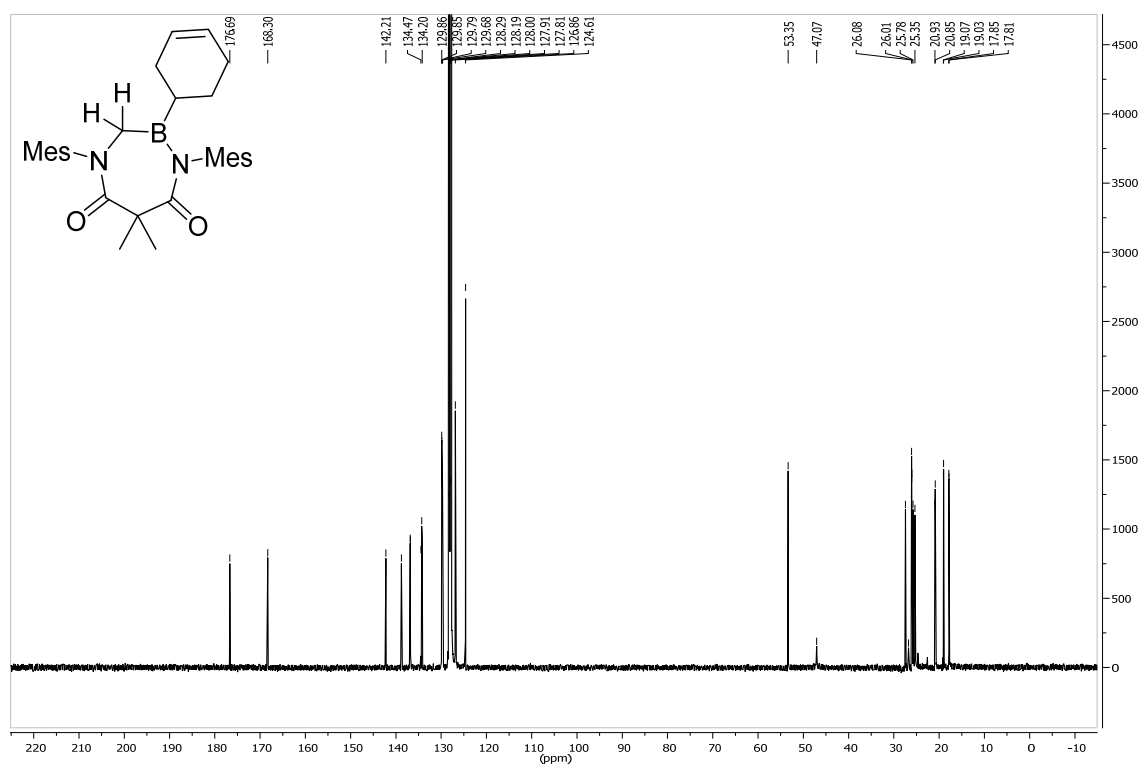Figure S11.  $^{13}\text{C}$  NMR spectrum of 7.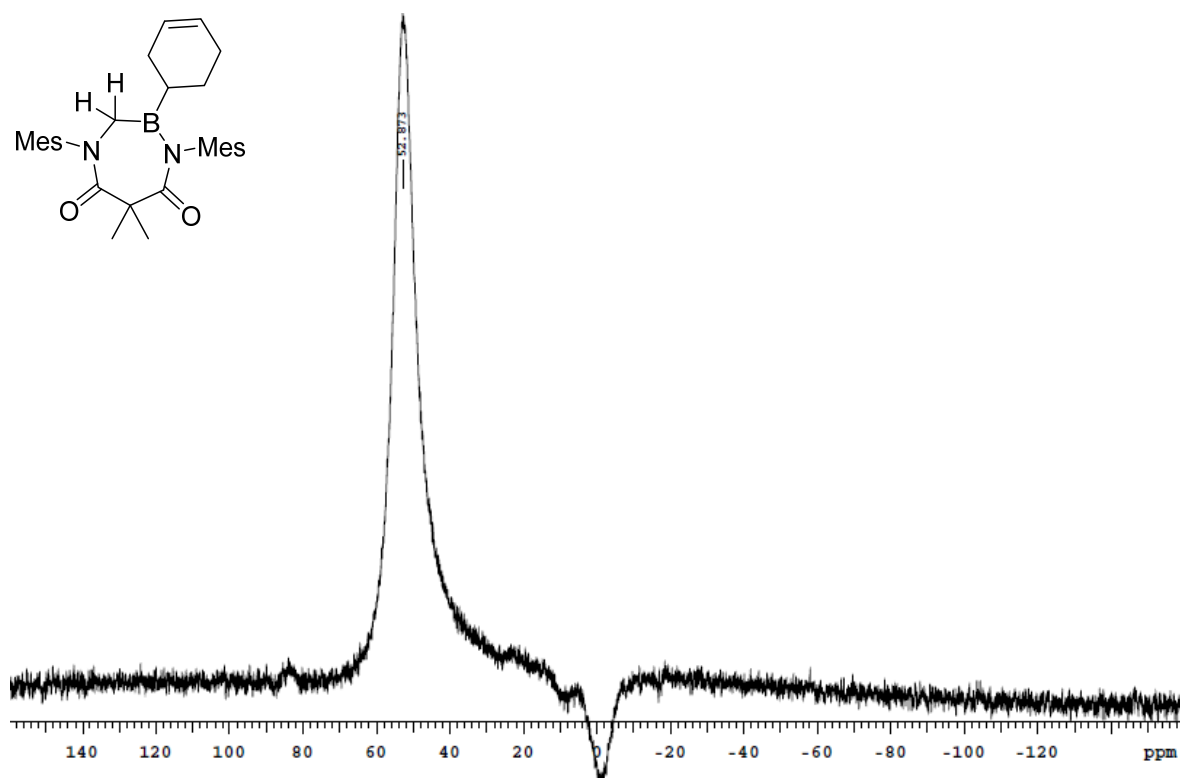Figure S12.  $^{11}\text{B}$  NMR spectrum of 7.

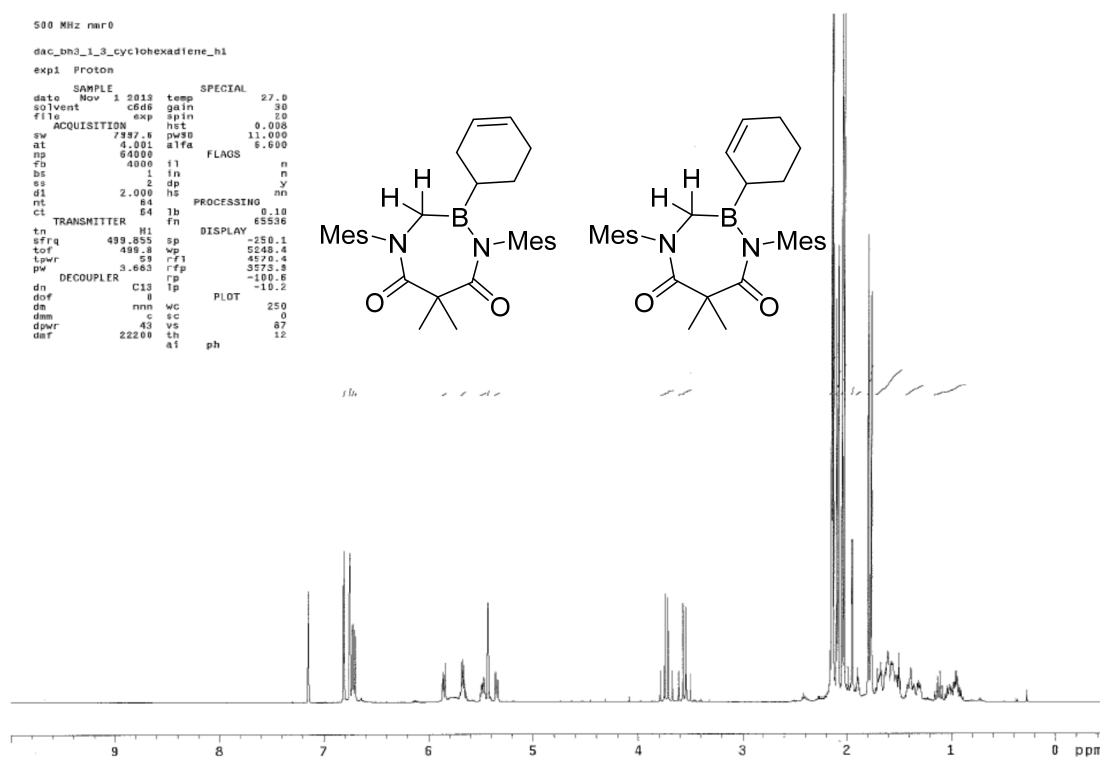Figure S13. <sup>1</sup>H NMR spectrum of 7 and 8.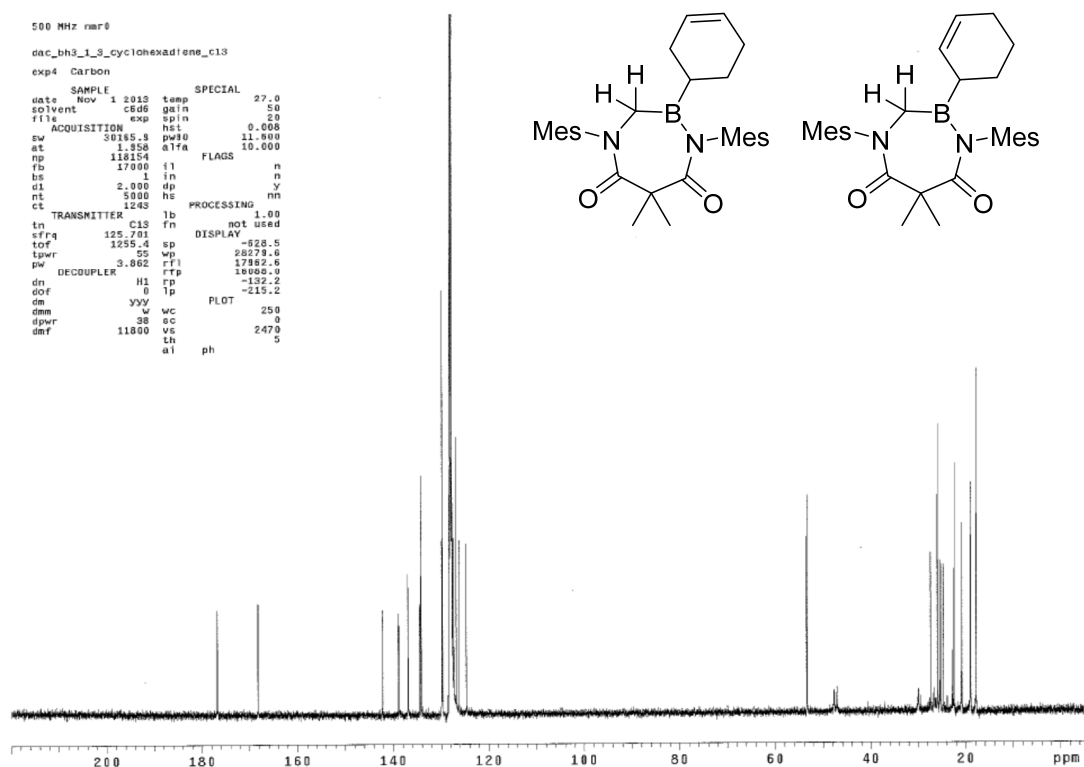Figure S14. <sup>13</sup>C NMR spectrum of 7 and 8.

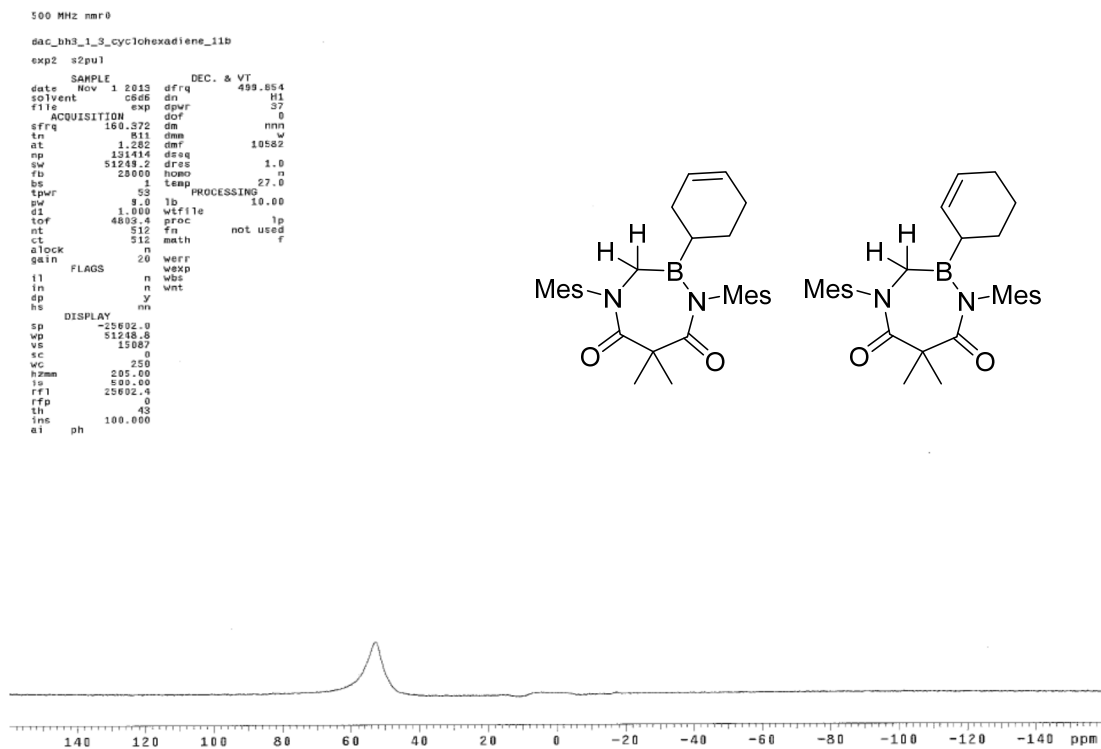Figure S15.  $^{11}\text{B}$  NMR spectrum of 7 and 8.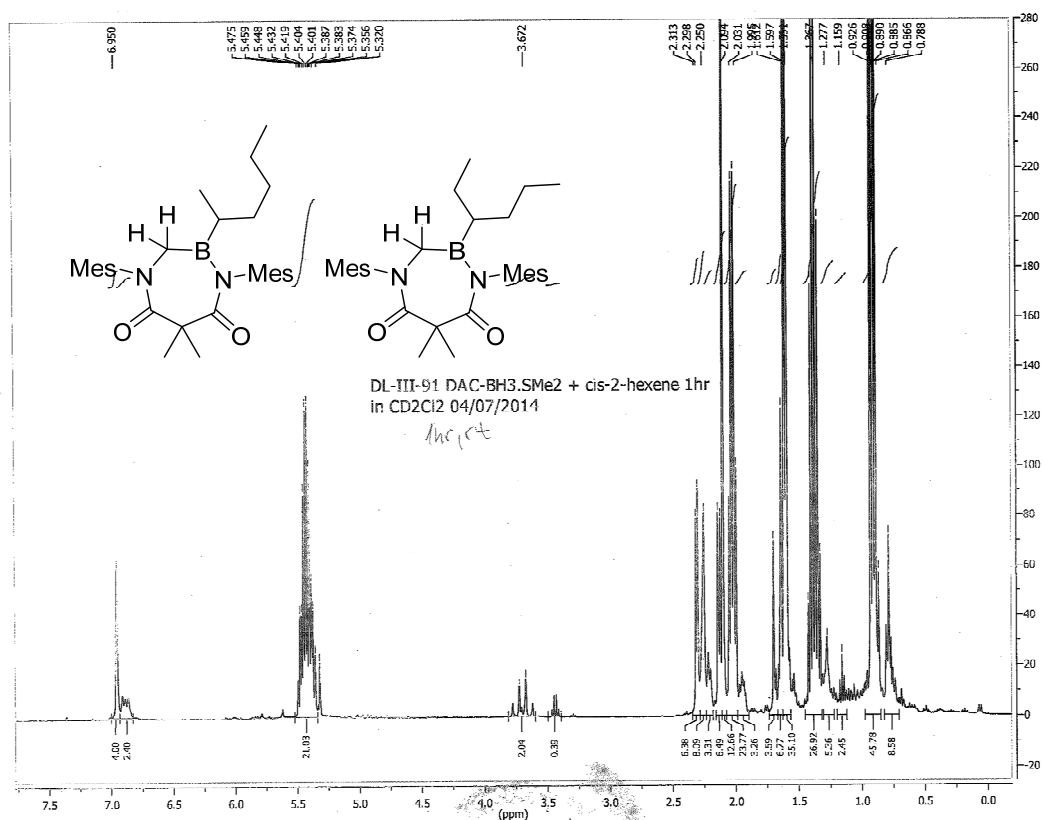Figure S16.  $^1\text{H}$  NMR spectrum of 9 and 10 obtained from *cis*-2-hexene.

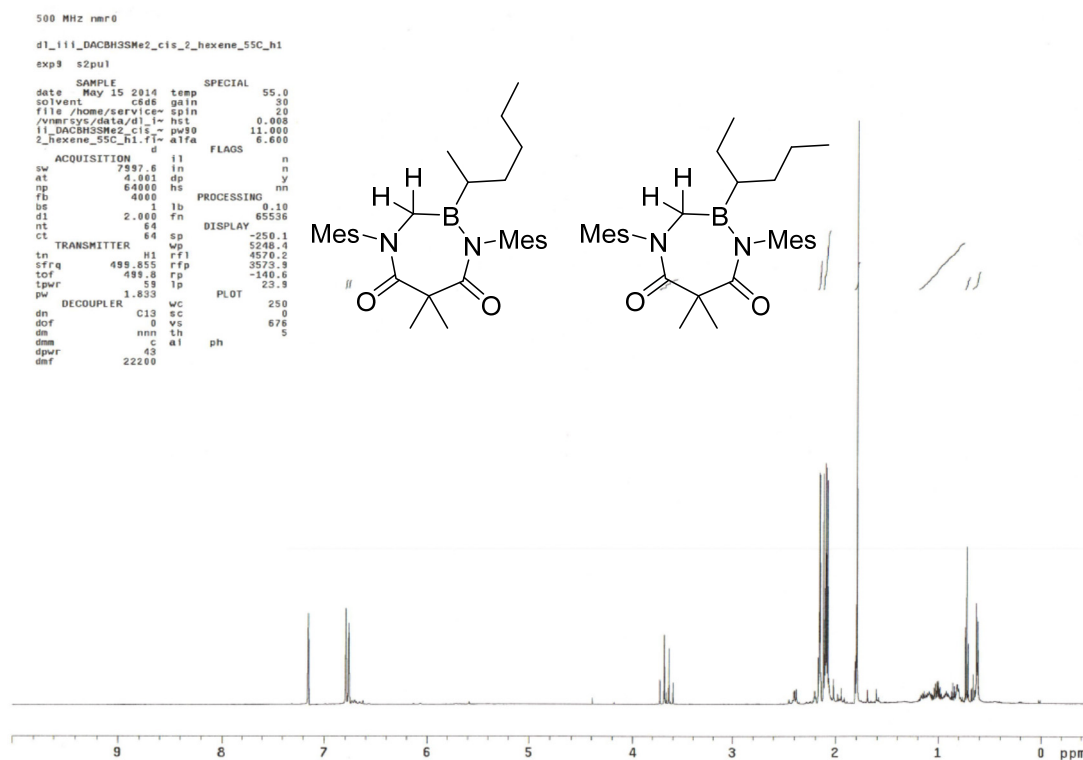

**Figure S17.** Variable Temperature (VT)  $^1\text{H}$  NMR spectrum of **9** and **10** obtained from *cis*-2-hexene at 55 °C.

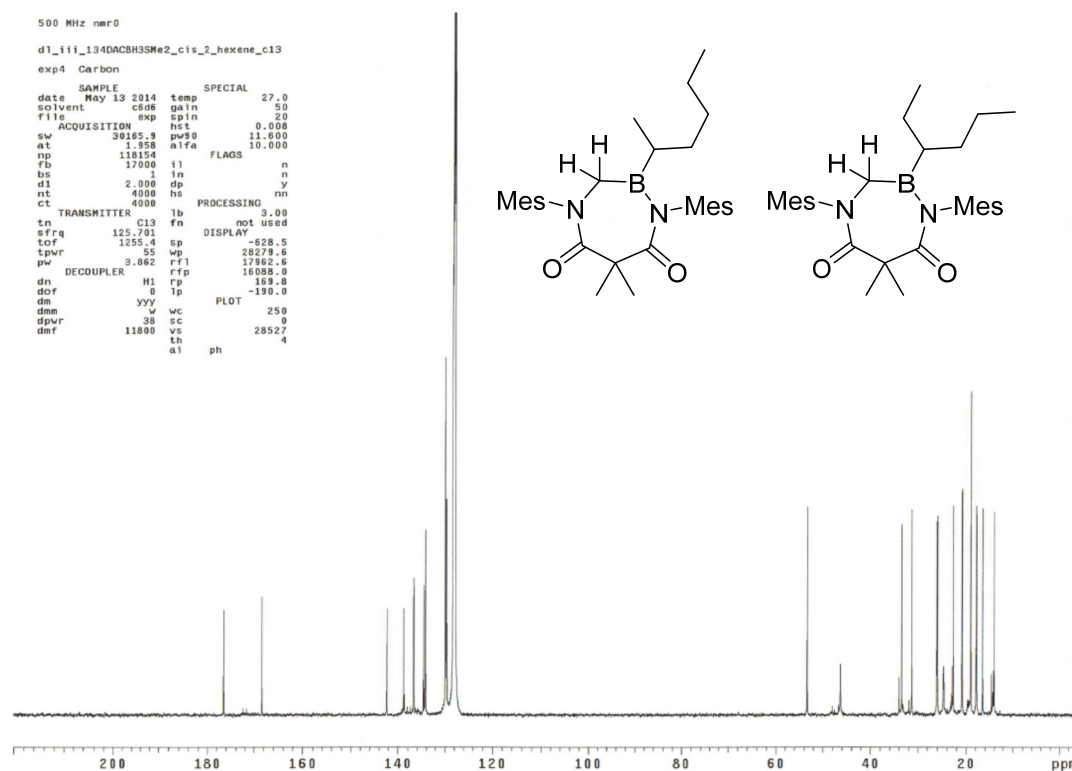

**Figure S18.**  $^{13}\text{C}$  NMR spectrum of **9** and **10** obtained from *cis*-2-hexene.

d1\_111\_134BACBH3SMe2\_cis\_2\_hexene\_b11  
Pulse Sequence: s2pu1

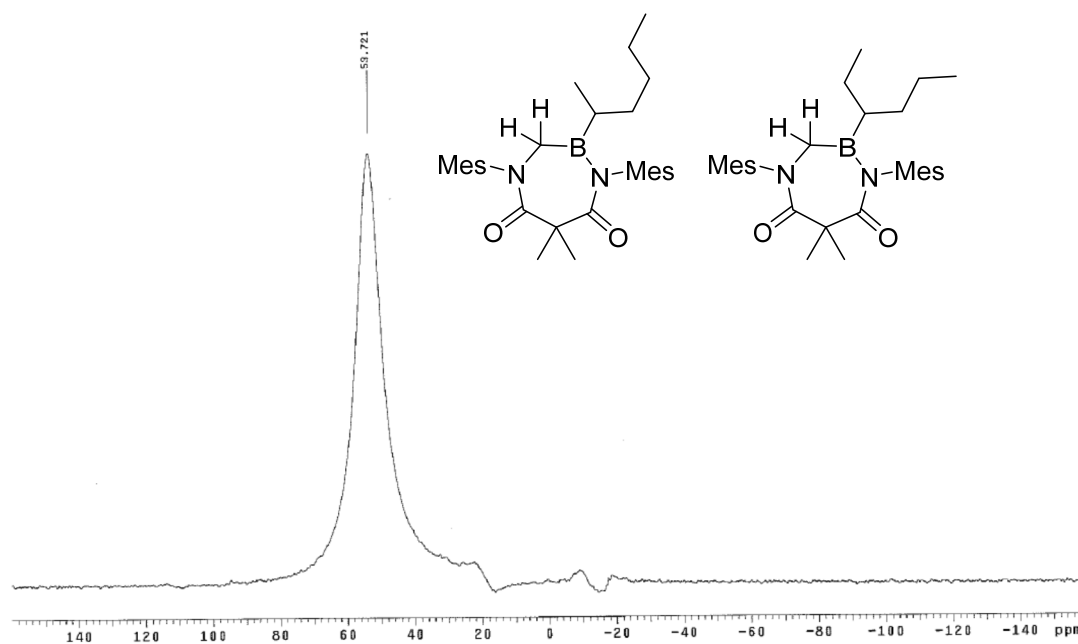

Figure S19.  $^{11}\text{B}$  NMR spectrum of **9** and **10** obtained from *cis*-2-hexene.

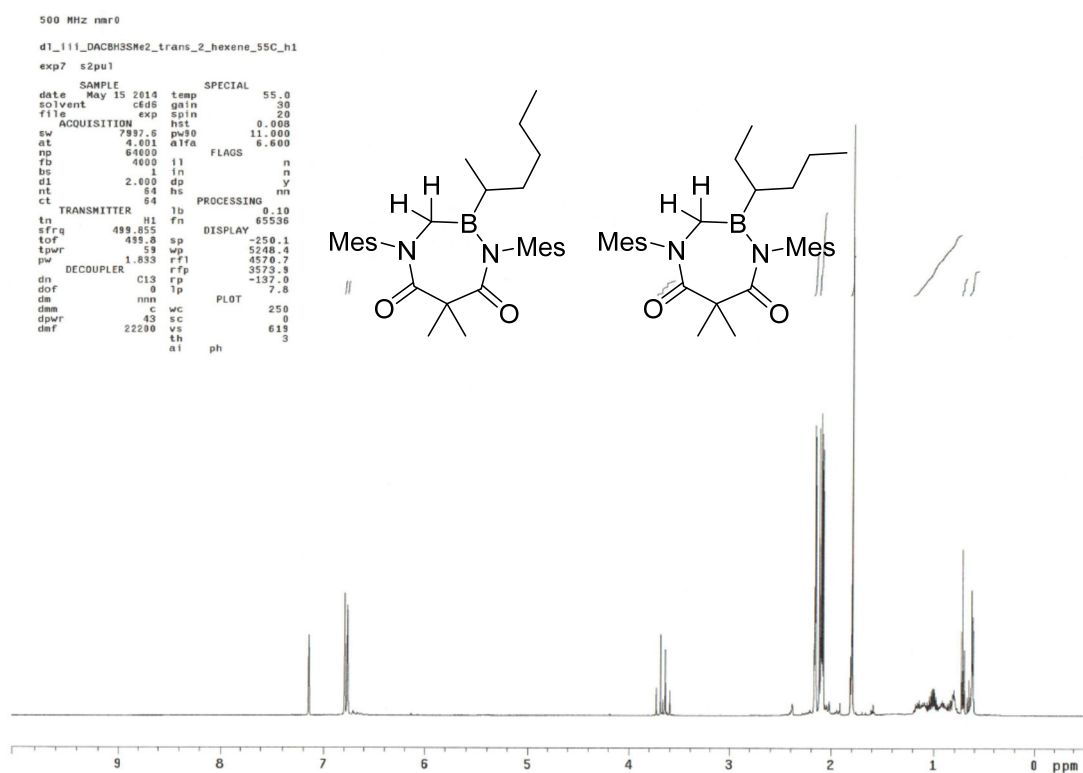

Figure S20. VT  $^1\text{H}$  NMR spectrum of **9** and **10** obtained from *trans*-2-hexene at 55 °C.

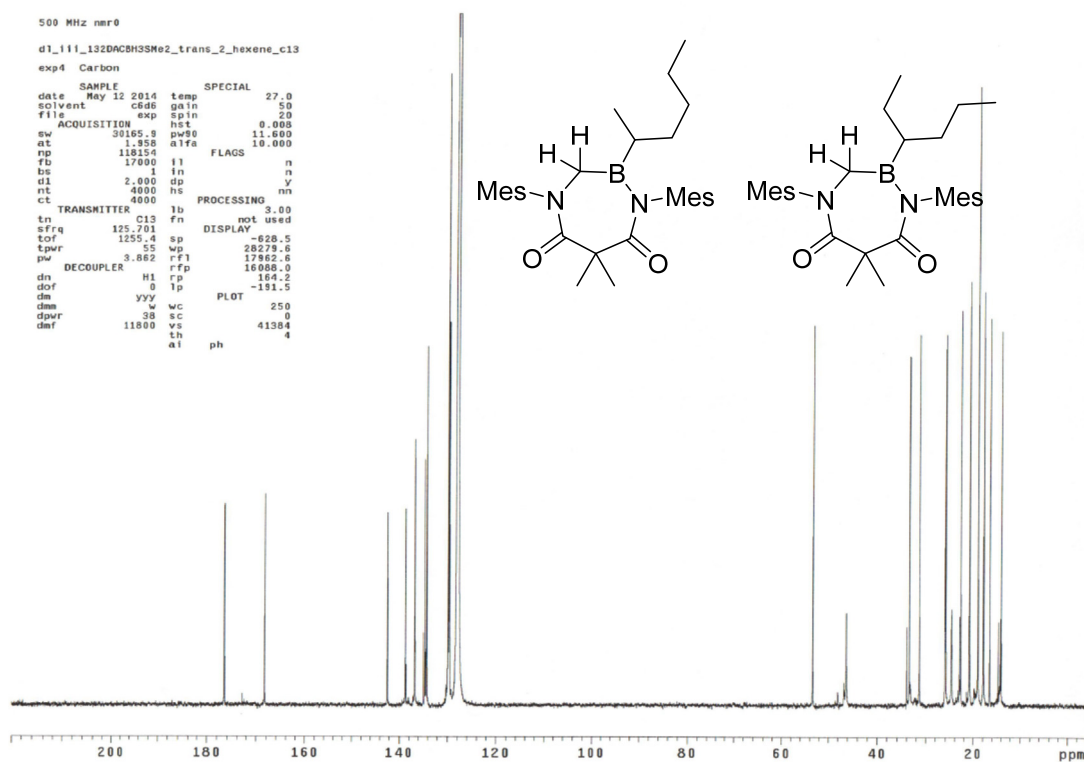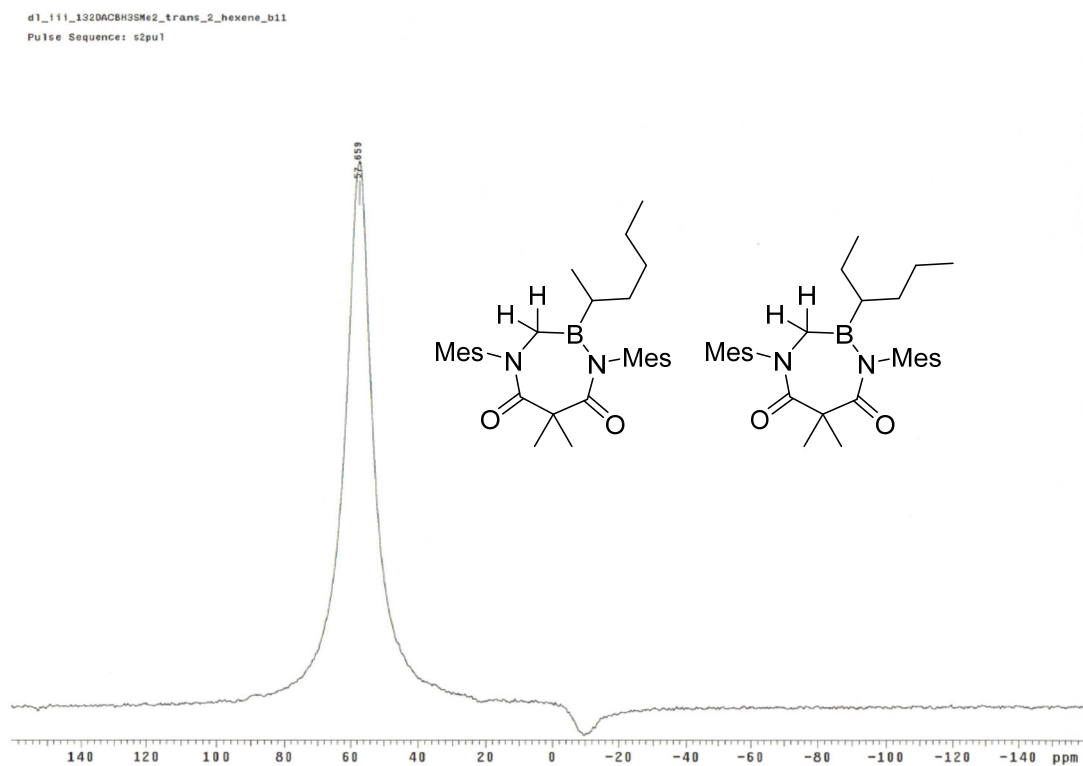

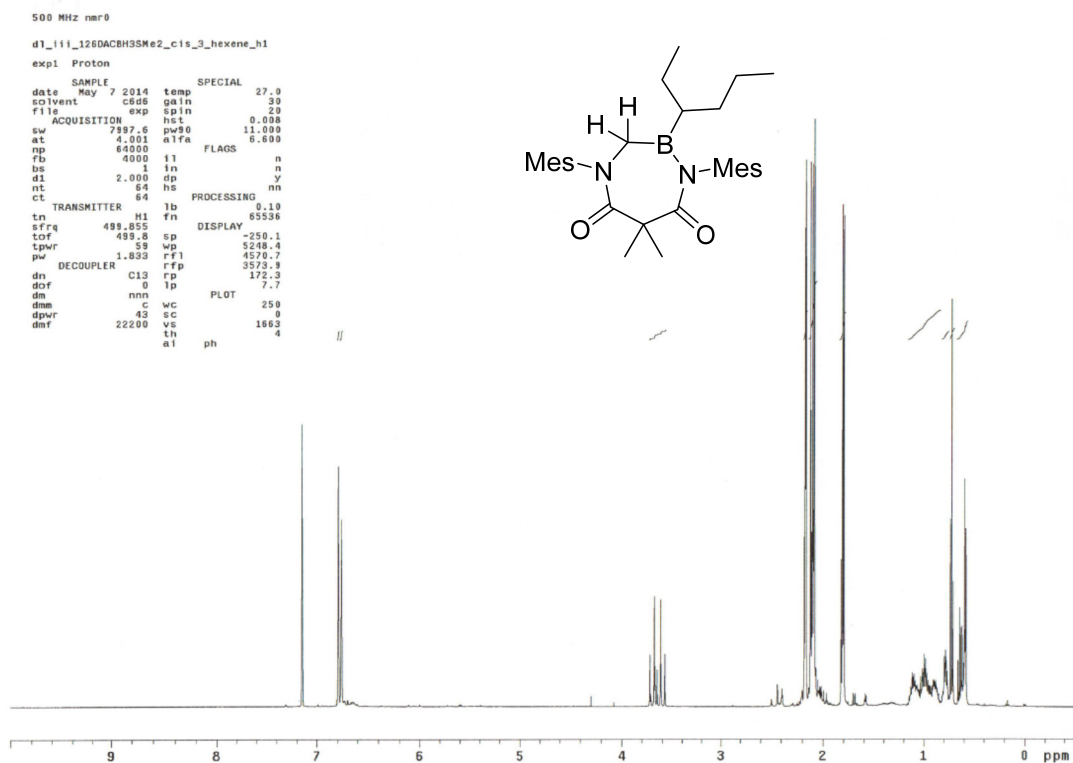Figure S23. <sup>1</sup>H NMR spectrum of 10 obtained from *cis*-3-hexene.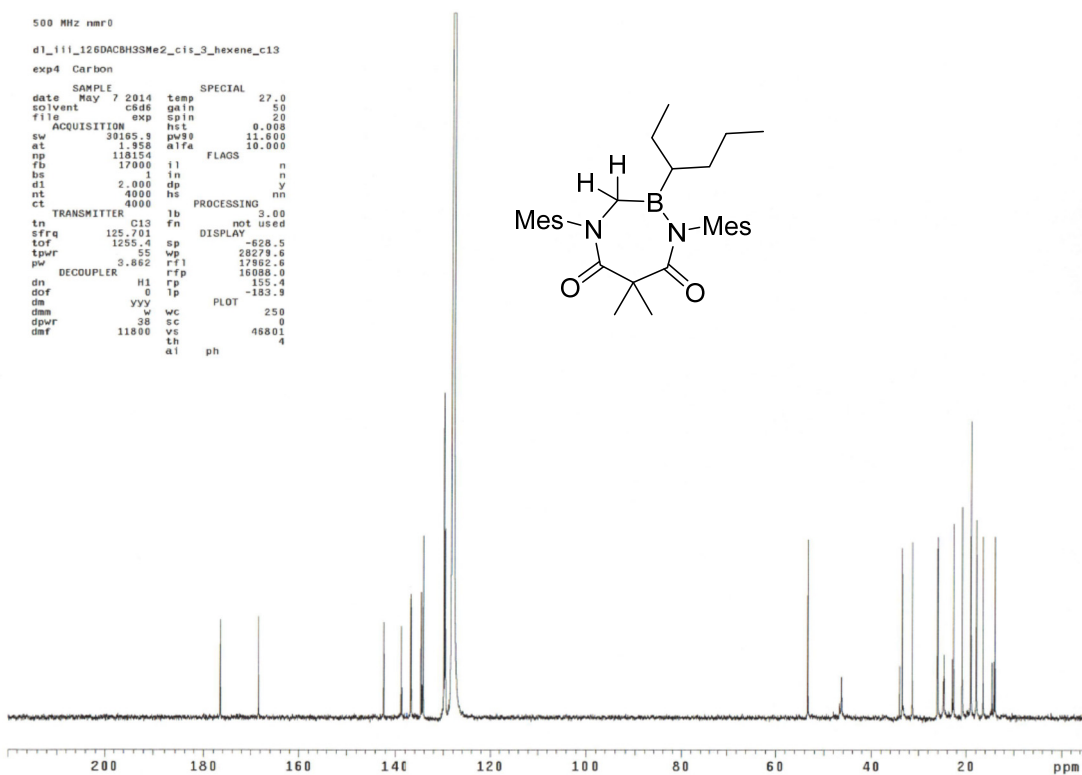Figure S24. <sup>13</sup>C NMR spectrum of 10 obtained from *cis*-3-hexene.

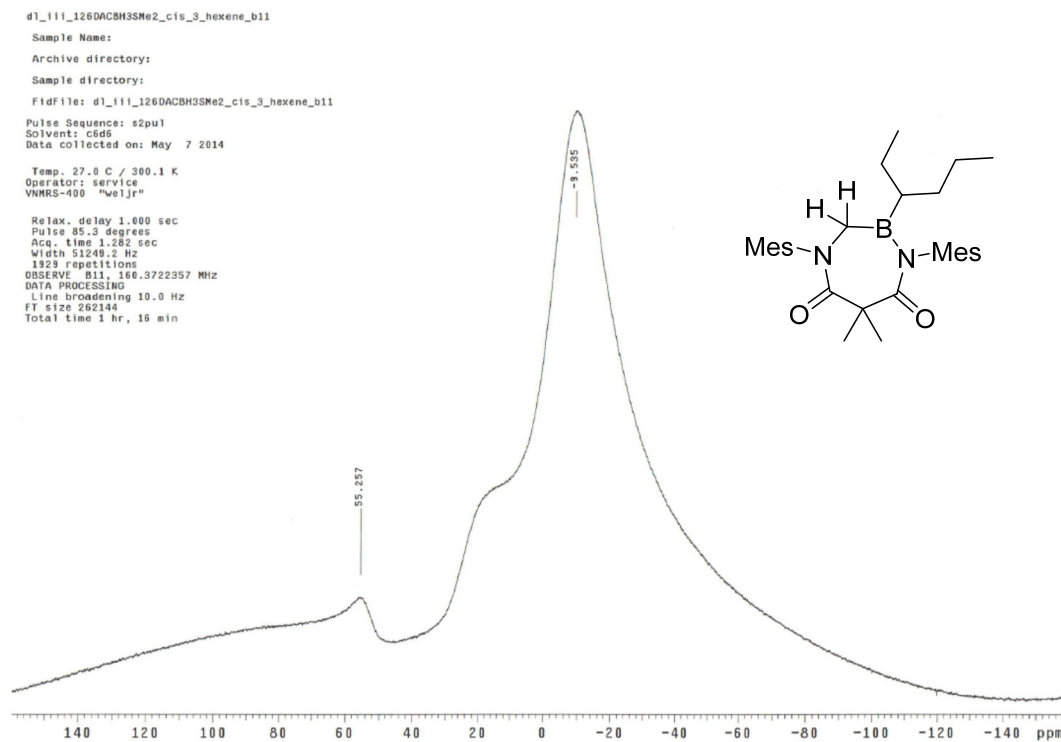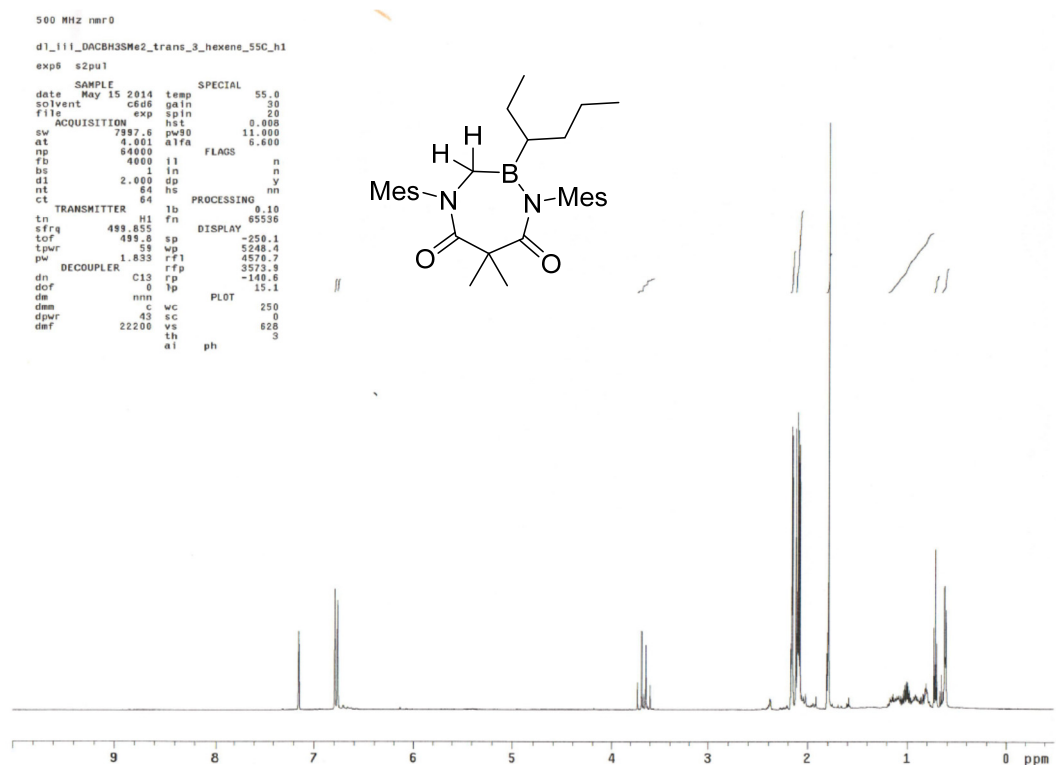

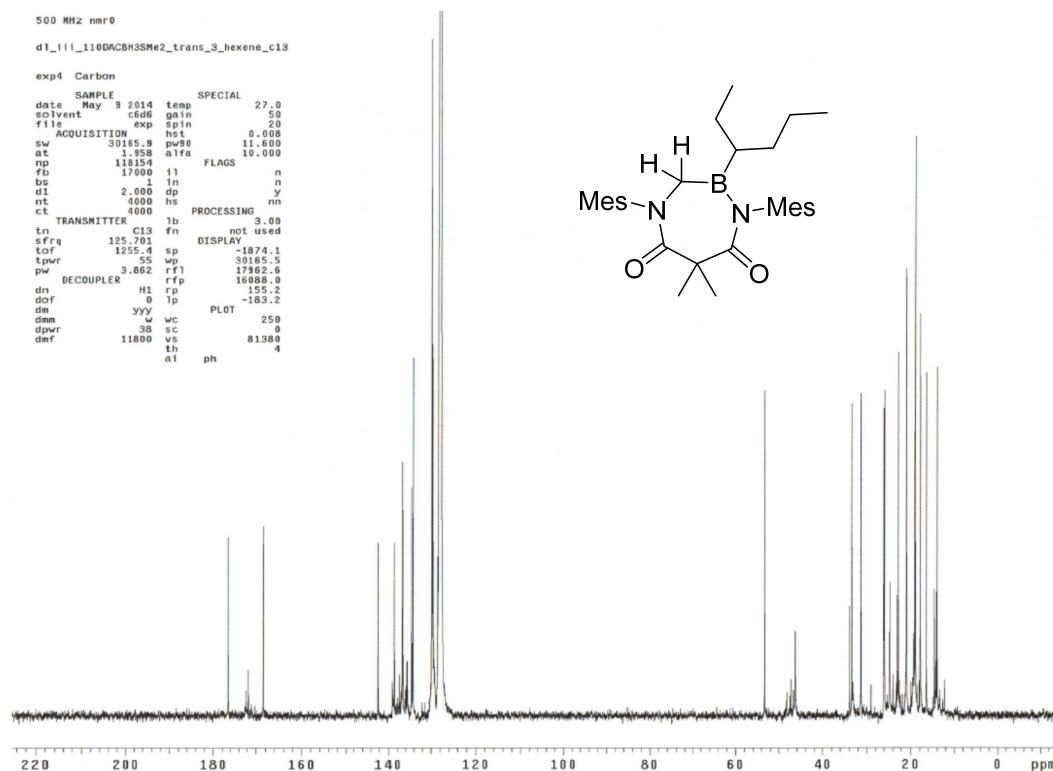Figure S27.  $^{13}\text{C}$  NMR spectrum of **10** obtained from *trans*-3-hexene.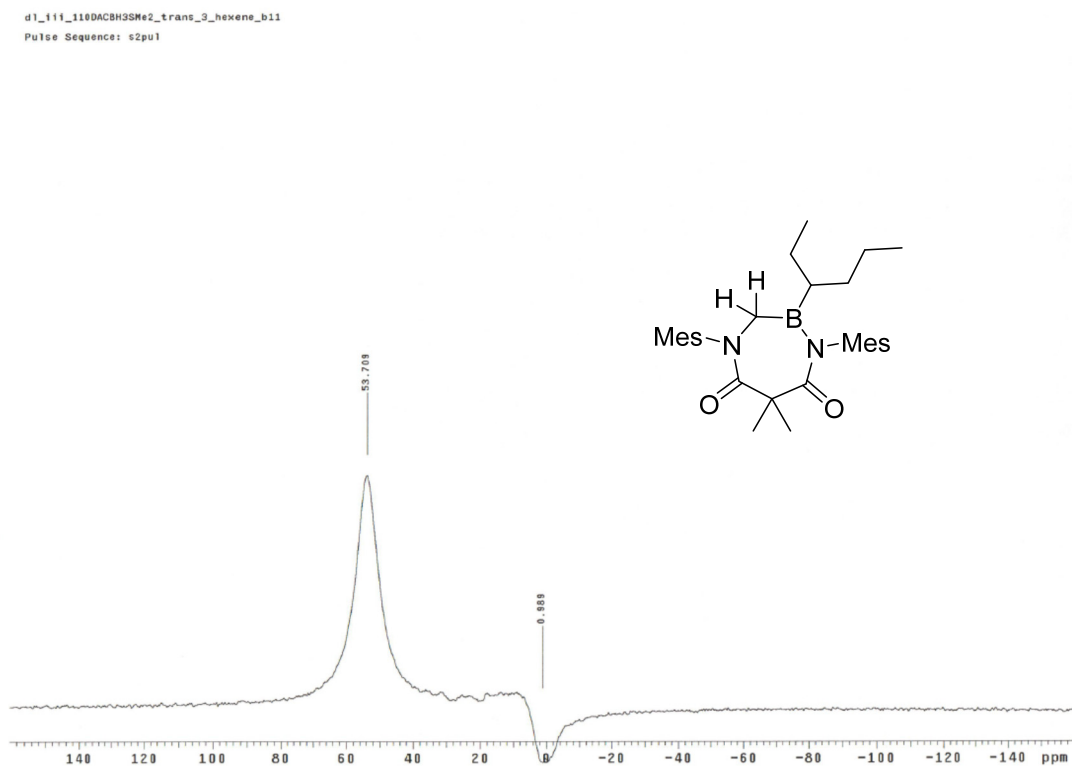Figure S28.  $^{11}\text{B}$  NMR spectrum of **10** obtained from *trans*-3-hexene.

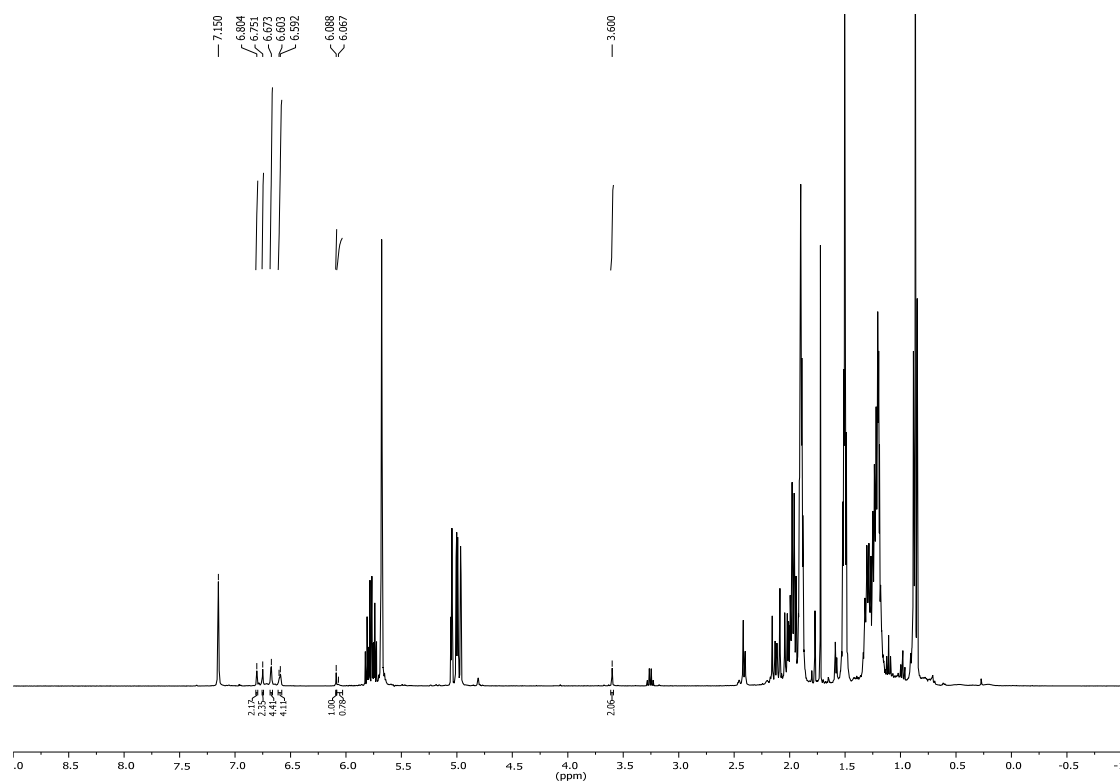

**Figure S29.** Crude  $^1\text{H}$  NMR spectrum of **6**, **11** and **12** obtained from reaction shown in Scheme 8.

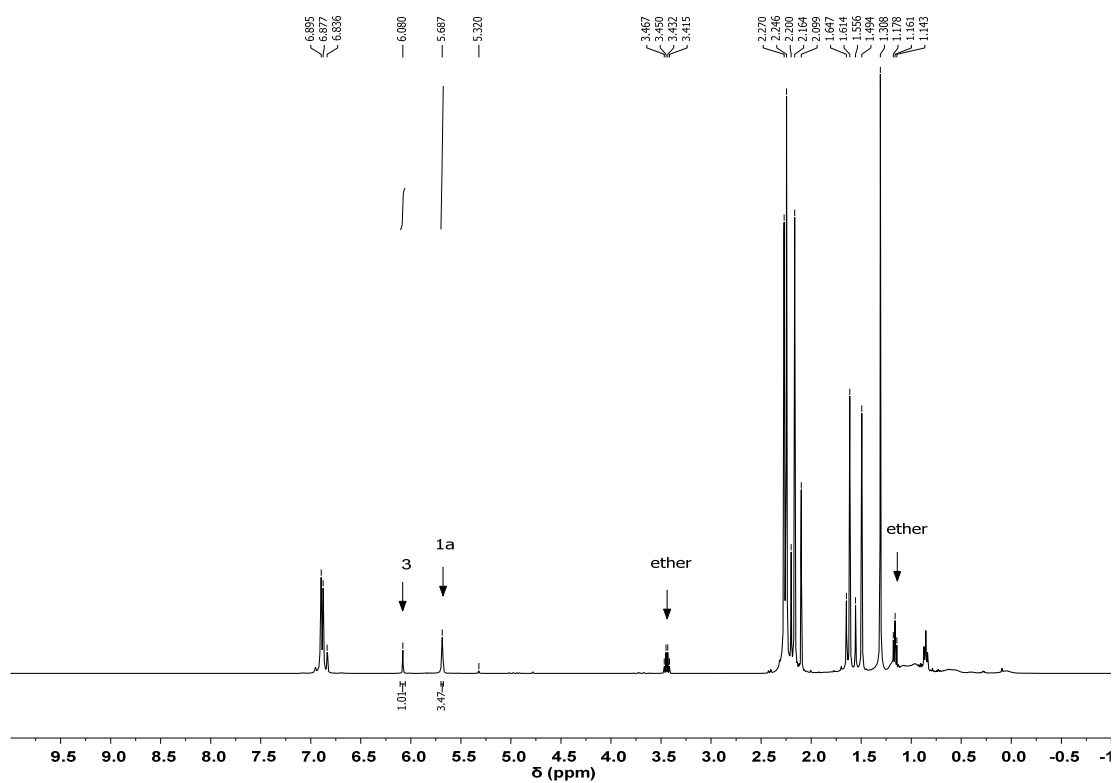

**Figure S30.** Crude  $^1\text{H}$  NMR spectrum recorded after combining **1a** and 0.5 equiv of 1-hexene in  $\text{CD}_2\text{Cl}_2$ .

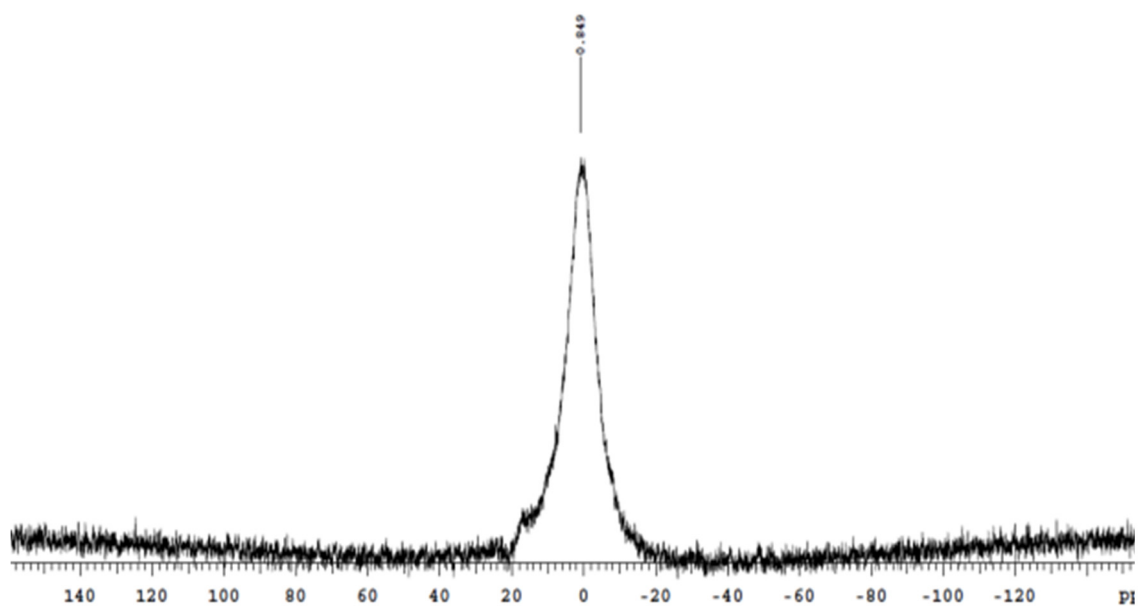

**Figure S31.**  $^{11}\text{B}$  NMR spectrum of  $\text{C}_6\text{D}_6$  as a reference.

## References

1. Otwinowski, Z.; Minor, W. *Methods in Enzymology: Macromolecular Crystallography, Part A*; Carter, C.W., Jr., Sweet, R.M., Eds.; Academic Press: San Diego, CA, USA, 1997; Volume 276, pp. 307–326.
2. Sheldrick, G.M. A short history of SHELX. *Acta Crystallogr. Sect. A* **2008**, *A64*, 112–122.
